# Supplementary material for: Hydrogen bond system generated by nitroamino rearrangement: new character for designing next generation energetic materials
Source: Royal Society of Chemistry journal article supplement (doi:10.1039/d0cc07101c), 2020-12-14
Supplement: d0cc07101c1.pdf [file d0cc07101c1.pdf]

## Electronic Supplementary Information

# Hydrogen bonds system generated by nitroamino rearrangement: new character for designing next generation energetic materials

Lu Hu,<sup>a</sup> Richard J. Staples,<sup>b</sup> and Jean'ne M. Shreeve<sup>a\*</sup>

<sup>a</sup> Department of Chemistry, University of Idaho, Moscow, Idaho 83844-2343, United States

<sup>b</sup> Department of Chemistry, Michigan State University, East Lansing, MI 48824, United States

Corresponding author email: Prof. Dr. J. M. Shreeve, [jshreeve@uidaho.edu](mailto:jshreeve@uidaho.edu)

### Table of Contents

|                                            |     |
|--------------------------------------------|-----|
| 1. Experimental section.....               | S2  |
| Synthesis of compounds <b>1-8</b> .....    | S2  |
| NMR Spectra.....                           | S4  |
| 2. X-ray Crystallography of <b>3</b> ..... | S11 |
| Figures S15 to S18.....                    | S12 |
| Tables S2.....                             | S13 |
| 3. Theoretical calculations.....           | S13 |
| 4. DSC spectra of compounds 3-6.....       | S14 |
| 5. References.....                         | S14 |

## 1. Experimental Section

Caution: Although we have not experienced any difficulties in preparing and handling these new energetic materials, proper protective precautions must be used. All compounds should be handled with care using the best safety practices.

### General Methods

All reagents were obtained from Alfa Aesar or AK Scientific and were used as supplied. A Bruker AVANCE 300 nuclear magnetic resonance spectrometer operating at 300.13, and 75.48 MHz was used to collect  $^1\text{H}$  and  $^{13}\text{C}$  spectra, respectively. DMSO- $d_6$  was employed as solvent and locking solvent. Chemical shifts are given relative to  $\text{Me}_4\text{Si}$  for  $^1\text{H}$  and  $^{13}\text{C}$  spectra. Thermal decomposition (onset) points were measured with a differential scanning calorimeter (TA Instruments Co., model Q2000) at a scan rate of  $5\text{ }^\circ\text{C min}^{-1}$ . Densities were determined at room temperature by a Micromeritics AccuPyc 1340 gas pycnometer. IR spectra were recorded on a FT-IR spectrometer (Thermo Nicolet AVATAR 370) as thin films using KBr plates. The impact and friction sensitivities were obtained by using a standard BAM Fallhammer and a BAM friction tester. Hirshfeld surfaces and 2D fingerprint plots for **3** were generated by CrystalExplorer 3.1.<sup>1</sup> Elemental analyses (C, H, N) were performed on a Vario Micro cube Elementar Analyser.

### 4-Cyano-5-carbamidrazone imidazole (1)

Hydrazine (98%, 1.5 mL (30 mmol)) was added dropwise to a solution of 4,5-dicyanoimidazole (1.18 g (10 mmol)) in isopropyl alcohol (30 mL) with stirring and cooling ( $0\text{ }^\circ\text{C}$ ). Stirring was continued overnight, and then the solid were filtered and washed with cold isopropyl alcohol (3 mL). The white solid (1.7 g, 93 %) was dried to give of product **1**.  $^1\text{H}$  NMR ( $[\text{D}_6]\text{DMSO}$ ):  $\delta$  6.97 (s, 4H), 7.30 (s, 1H);  $^{13}\text{C}$  NMR ( $[\text{D}_6]\text{DMSO}$ ):  $\delta$  116.7, 117.4, 148.7 ppm; IR (KBr pellet):  $\nu$  3344, 3070, 2229, 1744, 1611, 1551, 1490, 1439, 1302, 1134, 1109, 968, 873, 796, 660, 640, 523  $\text{cm}^{-1}$ ; elemental analysis ( $\text{C}_5\text{H}_6\text{N}_6$ , 150.15): calcd: C 40.00, H 4.03, N 55.97; found: C 40.23, H 3.97, N 56.11.

### 4,7-Diamino-imidazo[4,5-d]pyridazine (2)

Compound **1** (0.9 g (6 mmol)) dissolved in AcOH (5 mL) was allowed to stand for 1 day. The solvent was removed by air, the white crystals was washed with water (5 mL) and dried to give **2** (0.89 g (99 %)).  $^1\text{H}$  NMR ( $[\text{D}_6]\text{DMSO}$ ):  $\delta$  7.94 (s, 1H), 6.58 (s, 4H);  $^{13}\text{C}$  NMR ( $[\text{D}_6]\text{DMSO}$ ):  $\delta$  133.2, 148.3, 153.7 ppm; IR (KBr pellet):  $\nu$  3411, 3335, 3116, 1672, 1625, 1560, 1522, 1477, 1434, 1278, 1192, 1064, 1041, 939, 809, 715, 638, 561  $\text{cm}^{-1}$ ; elemental analysis ( $\text{C}_5\text{H}_6\text{N}_6\cdot\text{H}_2\text{O}$ , 168.16): calcd: C 35.71, H 4.80, N 49.98; found: C 35.65, H 4.75, N 49.90.

### 4(7)-Nitramino-7(4)-nitrimino -imidazo[4,5-d]pyridazine (3)

To nitric acid (100%, 4 mL) was added compound **2** (0.6 g, 4 mmol) in small portions with stirring at  $0\text{ }^\circ\text{C}$ . After complete addition, the reaction mixture was stirred for 2 h at  $0\text{ }^\circ\text{C}$  and warmed to room temperature. After complete reaction, ice (10 g) was added, the yellow precipitate was filtered and washed with cold water (3 ml) to give **3** (0.62 g (65%) of **3**.  $^1\text{H}$  NMR ( $[\text{D}_6]\text{DMSO}$ ):  $\delta$  8.73 (s, 1H);  $^{13}\text{C}$  NMR ( $[\text{D}_6]\text{DMSO}$ ):  $\delta$  133.1,

146.1, 147.6 ppm; IR (KBr pellet):  $\nu$  3437, 3250, 3125, 3003, 2807, 1614, 1601, 1544, 1486, 1456, 1434, 1355, 1306, 1232, 1190, 1152, 1079, 1004, 968, 877, 840, 793, 772, 756, 642  $\text{cm}^{-1}$ ; elemental analysis ( $\text{C}_5\text{H}_4\text{N}_8\text{O}_4$ , 240.14): calcd: C 25.01, H 1.68, N 46.66; found: C 25.16, H 1.75, N 47.33.

#### General Procedures for Synthesis of Compounds 4-7

To a solution of **3** (0.24 g, 1 mmol) in water (10 mL) was added 1.1 mmol aqueous ammonia (28 wt. % in  $\text{H}_2\text{O}$ , 67 mg), hydrazine monohydrate (98%, 55 mg), hydroxylamine (50 wt. % in  $\text{H}_2\text{O}$ , 73 mg) or sodium hydroxide (44 mg in 0.5 mL water). The reaction was stirred at room temperature for 1 h and then filtered to obtain the desired products **4** to **7**.

#### Ammonium 4(7)-nitramino-7(4)-nitrimino-imidazo[4,5-d]pyridazine (**4**)

Red solid, yield 0.18 g (70.7%).  $^1\text{H}$  NMR ( $[\text{D}_6]$ DMSO):  $\delta$  8.38 (s, 1H), 6.35 (s, 4H);  $^{13}\text{C}$  NMR ( $[\text{D}_6]$ DMSO):  $\delta$  132.4, 145.3, 148.9 ppm; IR (KBr pellet):  $\nu$  3433, 3232, 3126, 1618, 1561, 1459, 1412, 1325, 1303, 1194, 1126, 1086, 1015, 972, 945, 828, 769, 659, 624, 603  $\text{cm}^{-1}$ ; elemental analysis ( $\text{C}_5\text{H}_7\text{N}_9\text{O}_4$ , 257.17): calcd: C 23.35, H 2.74, N 49.02; found: C 22.94, H 3.00, N 49.17.

#### Hydrazinium 4(7)-nitramino-7(4)-nitrimino-imidazo[4,5-d]pyridazine (**5**)

Red solid, yield 0.2 g (89%).  $^1\text{H}$  NMR ( $[\text{D}_6]$ DMSO):  $\delta$  8.45 (s, 1H), 9.0 (s, 4H);  $^{13}\text{C}$  NMR ( $[\text{D}_6]$ DMSO):  $\delta$  132.4, 145.2, 148.7 ppm; IR (KBr pellet):  $\nu$  3432, 3343, 3234, 3047, 2230 1611, 1522, 1459, 1414, 1325, 1307, 1205, 1144, 1122, 1088, 1017, 973, 949, 839, 769, 657, 626, 603  $\text{cm}^{-1}$ ; elemental analysis ( $\text{C}_5\text{H}_8\text{N}_{10}\text{O}_4$ , 272.19): calcd: C 22.06, H 2.96, N 51.46; found: C 21.83, H 3.08, N 51.29.

#### Hydroxylammonium 4(7)-nitramino-7(4)-nitrimino-imidazo[4,5-d]pyridazine (**6**)

Yellow solid, yield 0.21 g (92%).  $^1\text{H}$  NMR ( $[\text{D}_6]$ DMSO):  $\delta$  8.48 (s, 1H), 9.1 (s, 5H);  $^{13}\text{C}$  NMR ( $[\text{D}_6]$ DMSO):  $\delta$  132.2, 145.3, 148.7 ppm; IR (KBr pellet):  $\nu$  3442, 3240, 3118, 1161, 1527, 1459, 1409, 1322, 1189, 1122, 1084, 1013, 974, 955, 887, 825, 765, 657, 626, 602  $\text{cm}^{-1}$ ; elemental analysis ( $\text{C}_5\text{H}_7\text{N}_9\text{O}_5$ , 273.17): calcd: C 21.98, H 2.58, N 46.15; found: C 21.63, H 2.94, N 45.90.

#### Sodium 4(7)-nitramino-7(4)-nitrimino-imidazo[4,5-d]pyridazine (**7**)

Yellow solid, yield 0.21 g (92%).  $^1\text{H}$  NMR ( $[\text{D}_6]$ DMSO):  $\delta$  8.45 (s, 1H);  $^{13}\text{C}$  NMR ( $[\text{D}_6]$ DMSO):  $\delta$  132.8, 145.3, 148.7 ppm; IR (KBr pellet):  $\nu$  3463, 3247, 1611, 1528, 1459, 1399, 1358, 1199, 1128, 1085, 1015, 947, 828, 767, 661, 603  $\text{cm}^{-1}$ ; elemental analysis ( $\text{C}_5\text{H}_3\text{N}_8\text{O}_4\text{Na}\cdot\text{H}_2\text{O}$ , 280.14): calcd: C 21.44, H 1.80, N 40.00; found: C 21.55, H 2.11, N 40.01.

#### Disodium 4,7-dinitramino-imidazo[4,5-d]pyridazine (**8**)

To a solution of **3** (0.24 g, 1 mmol) in water (10 mL) was added NaOH (0.088 g, 2.2 mmol). The reaction was heated to 80  $^\circ\text{C}$  for 2 h. The solvent was blown off with air to obtain **8** (0.26 g, 92% yield).  $^1\text{H}$  NMR ( $[\text{D}_6]$ DMSO):  $\delta$  7.99 (s, 1H);  $^{13}\text{C}$  NMR ( $[\text{D}_6]$ DMSO):  $\delta$  137.3, 150.5, 152.8 ppm; IR (KBr pellet):  $\nu$  3423, 3244, 1637, 1384, 1336, 1215, 1140, 1126, 1084, 1014, 989, 945, 764, 631, 604  $\text{cm}^{-1}$ ; elemental analysis ( $\text{C}_5\text{H}_2\text{N}_8\text{O}_4\text{Na}_2\cdot 2\text{H}_2\text{O}$ , 320.13): calcd: C 18.76, H 1.89, N 35.00; found: C 18.64, H 1.64, N 35.25.

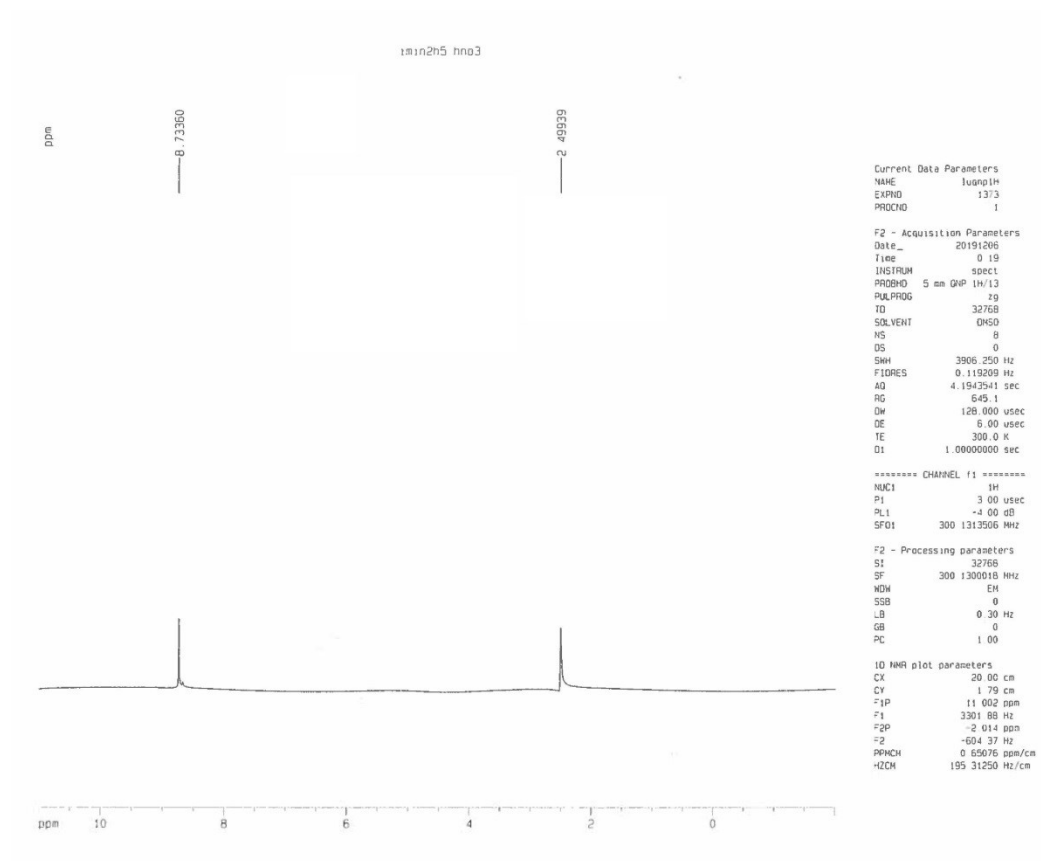

Figure S1 <sup>1</sup>H NMR of **3**.

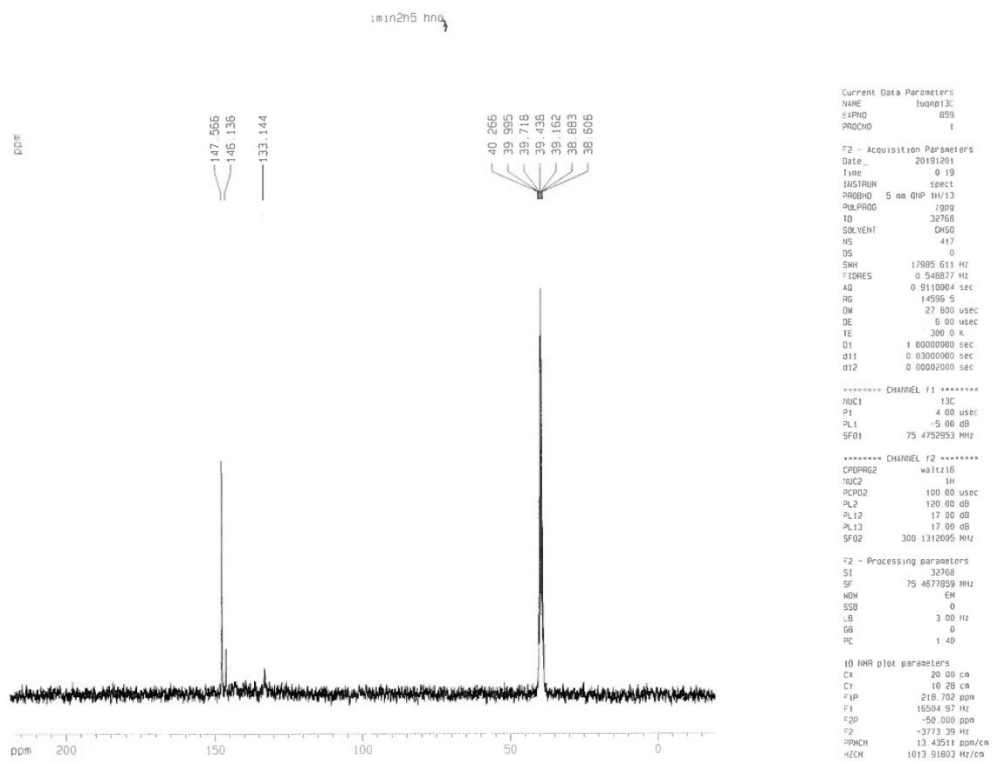

Figure S2  $^{13}\text{C}$  NMR of **3**.

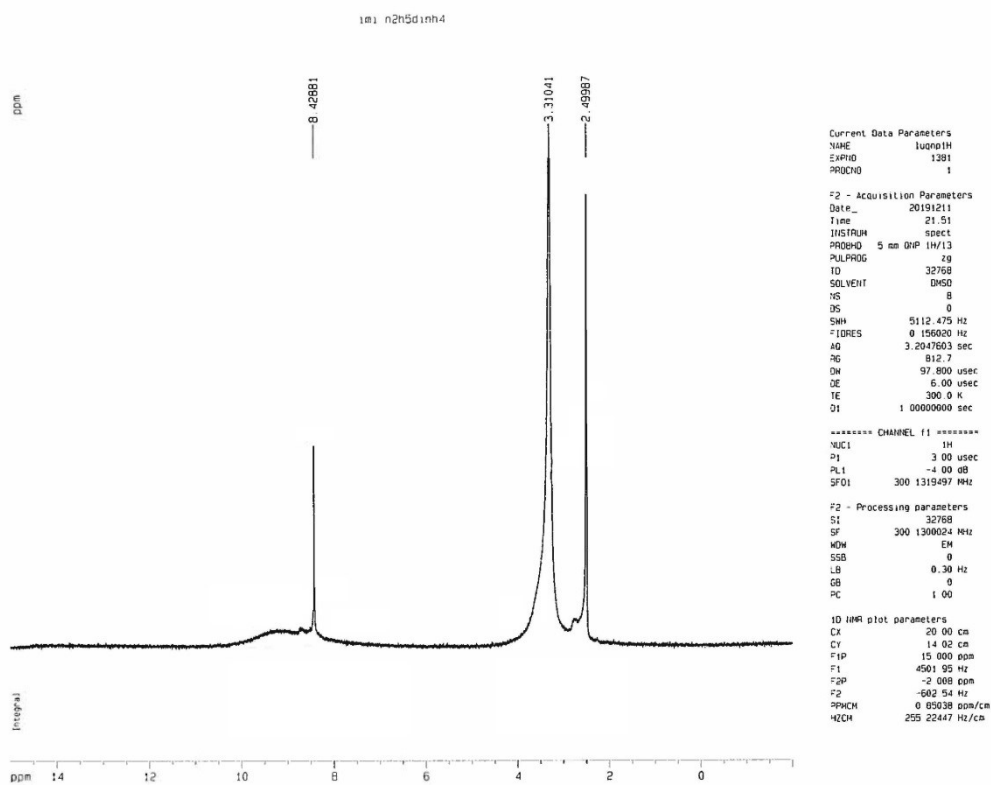

Figure S3 <sup>1</sup>H NMR of 4.

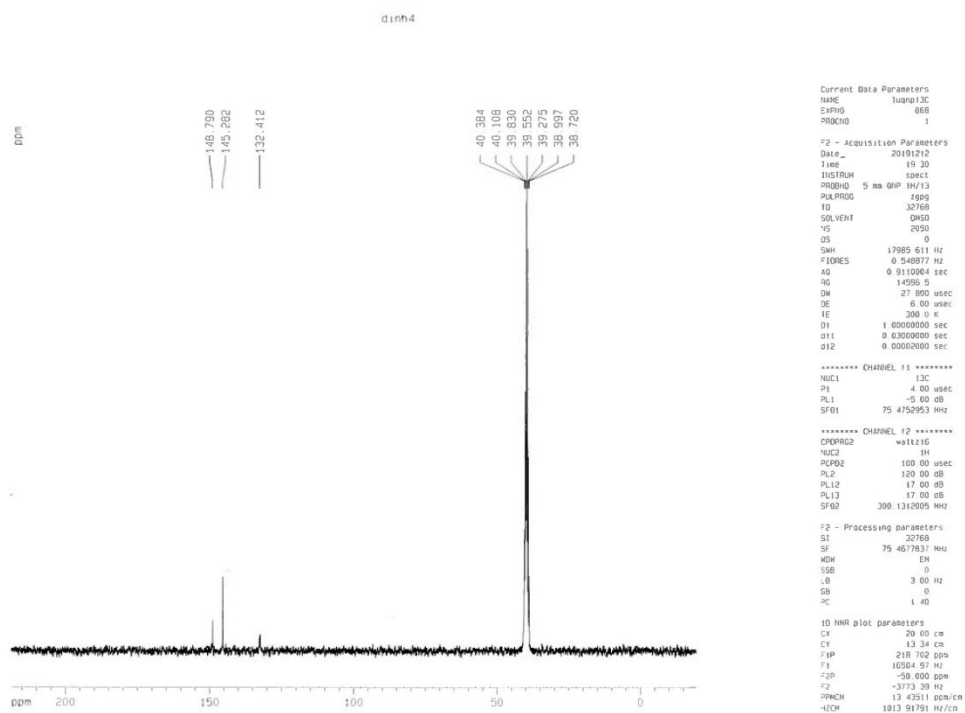

Figure S4 <sup>13</sup>C NMR of 4.

Fi

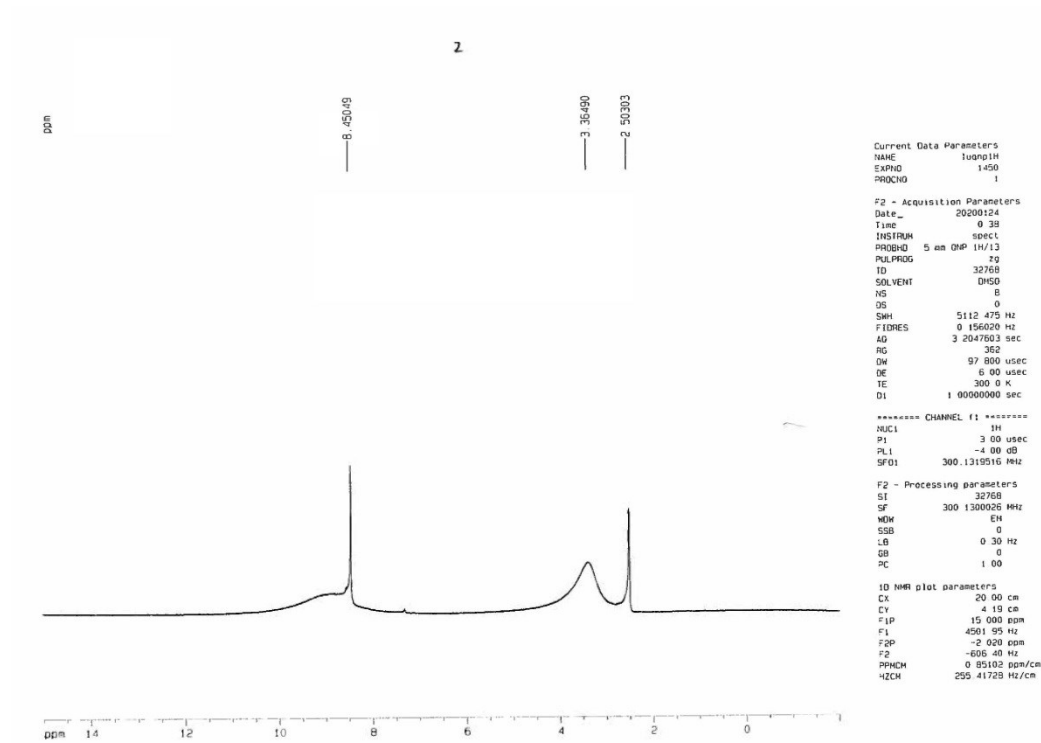

Figure S5 <sup>1</sup>H NMR of 5.

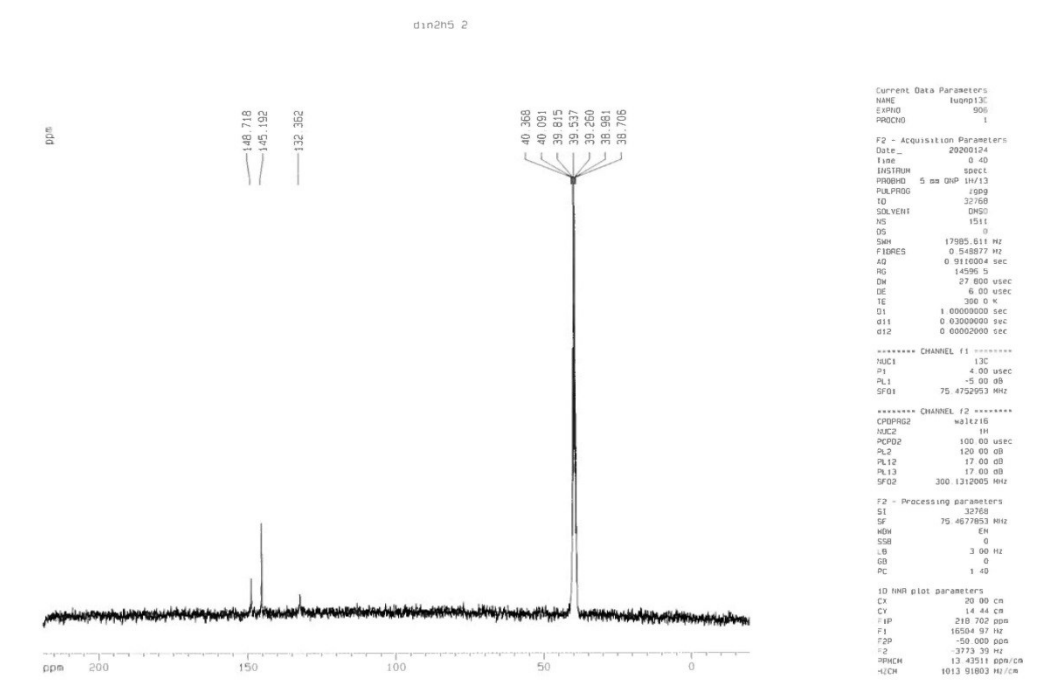

Figure S6 <sup>13</sup>C NMR of 5.

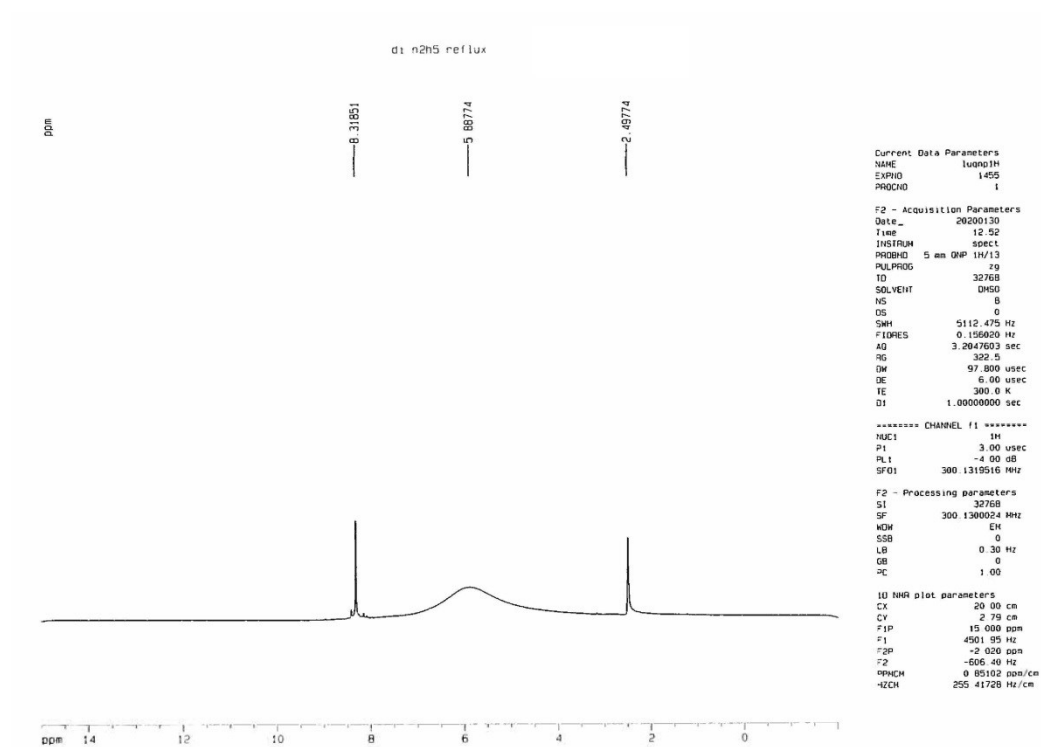

Figure S7  $^1\text{H}$  NMR of salts that contain 1.5 hydrazinium.

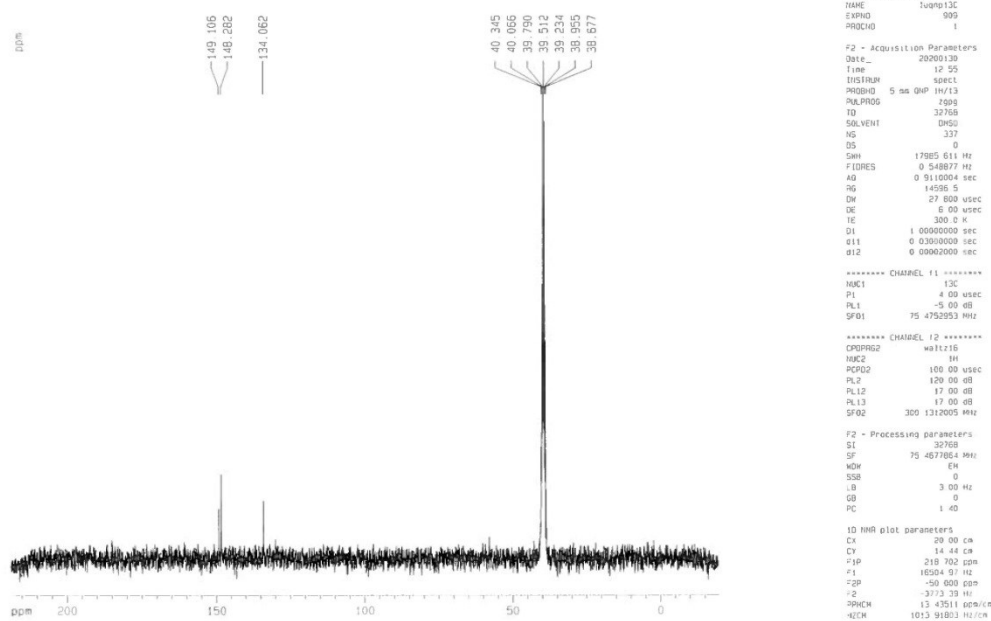

Figure S8  $^{13}\text{C}$  NMR of salts that contain 1.5 hydrazinium.



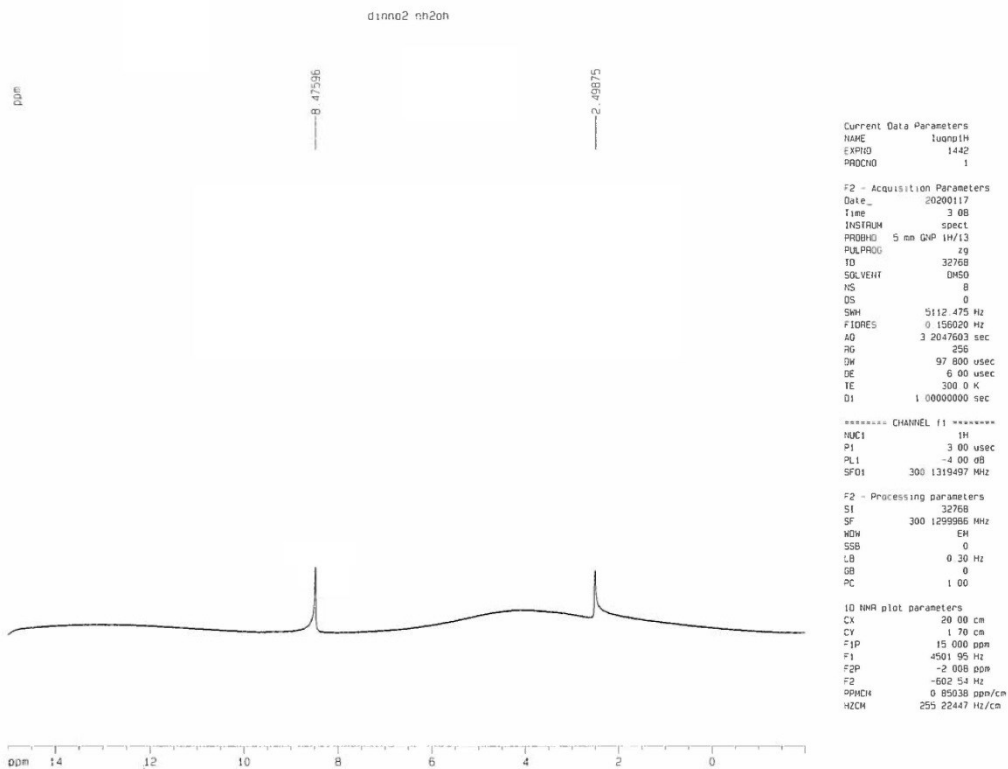

Figure S9 <sup>1</sup>H NMR of **6**.

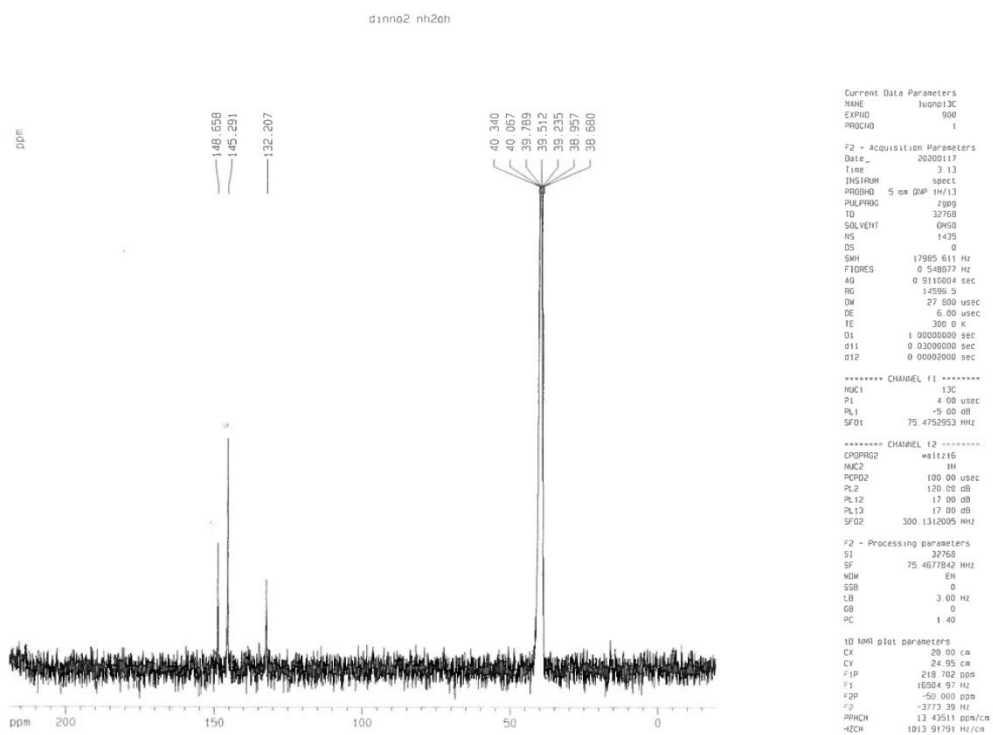

Figure S10 <sup>13</sup>C NMR of **6**.

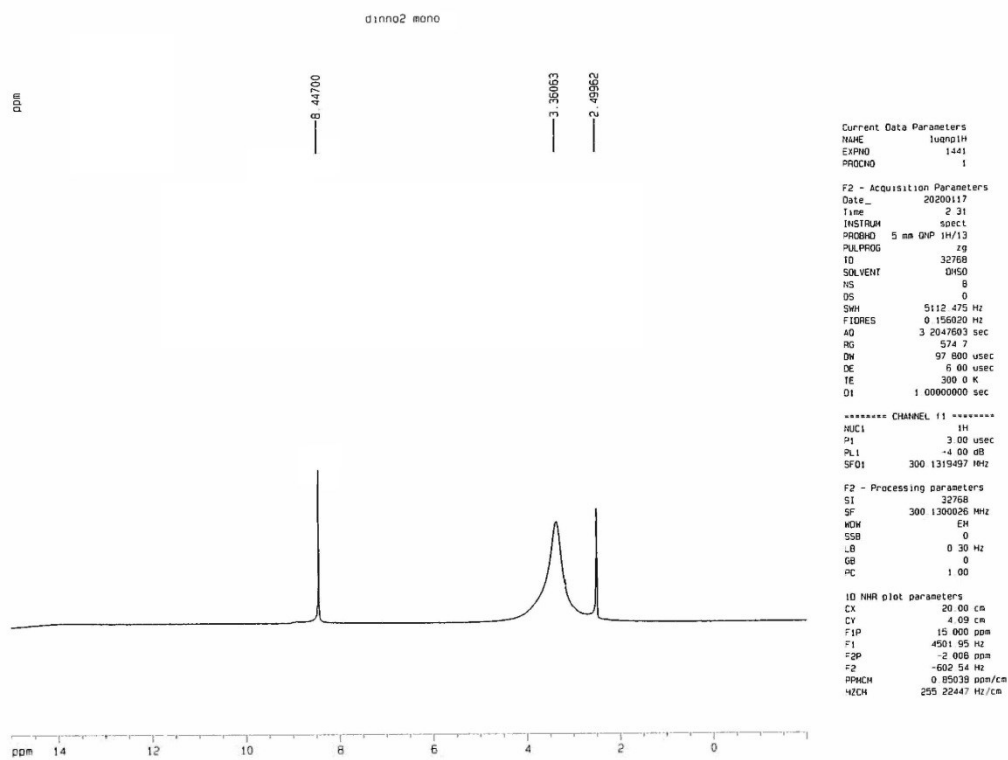

Figure S11  $^1\text{H}$  NMR of 7.

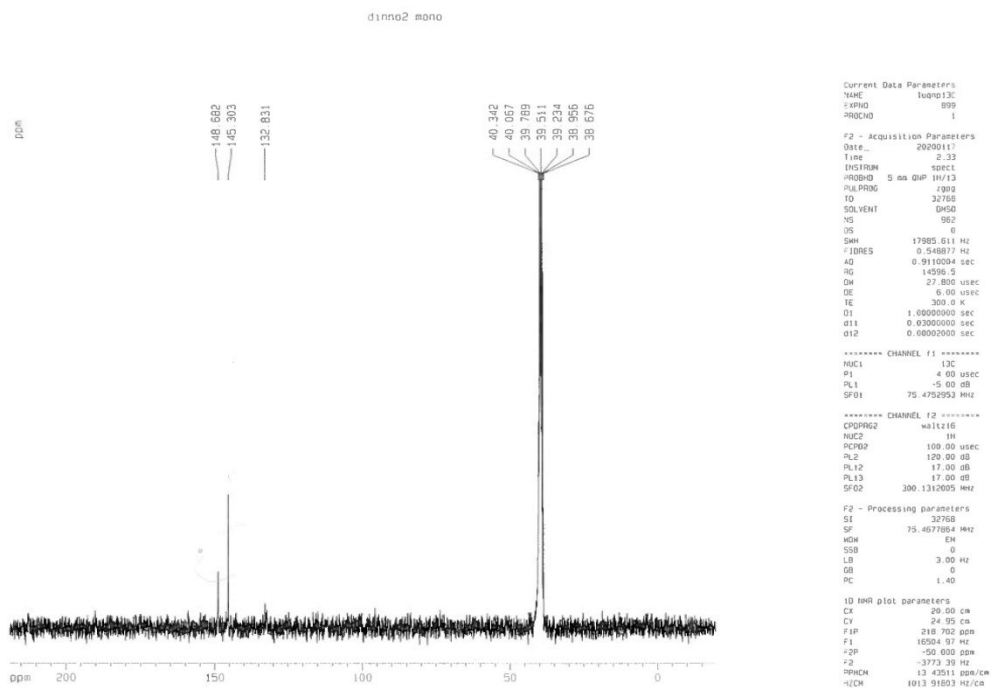

Figure S12  $^{13}\text{C}$  NMR of 7.

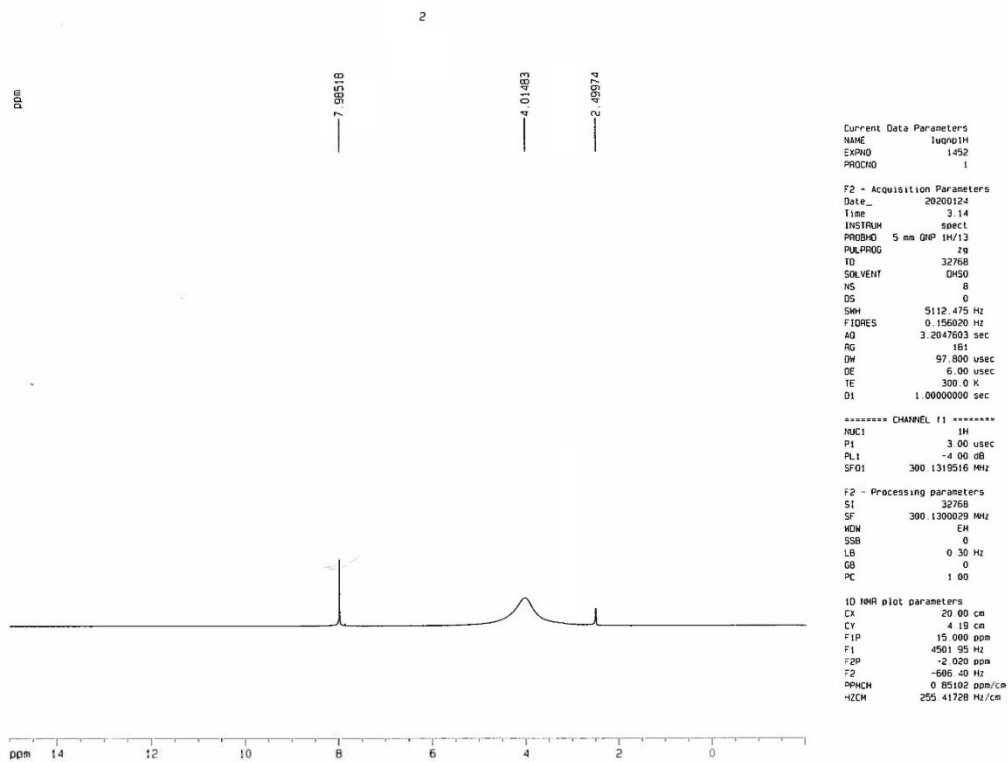

Figure S13 <sup>1</sup>H NMR of **8**.

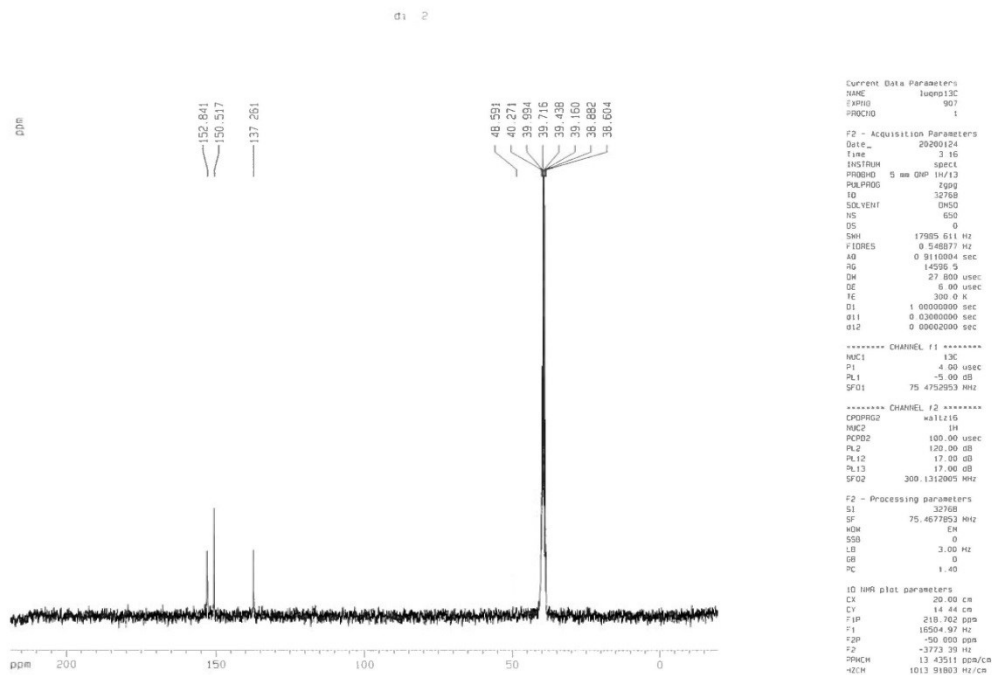

Figure S14 <sup>13</sup>C NMR of **8**.

## 2. X-ray Crystallography of 3

**Table S1.** Crystal data and structure refinement for crystals

| Compound                    | 3                                                                |
|-----------------------------|------------------------------------------------------------------|
| CCDC No.                    | 2024028                                                          |
| Formula                     | C <sub>7</sub> H <sub>11</sub> N <sub>8</sub> O <sub>5.5</sub> S |
| $D_{calc}/g\text{ cm}^{-3}$ | 1.630                                                            |
| $\mu/\text{mm}^{-1}$        | 2.598                                                            |
| Formula Weight              | 327.30                                                           |
| Colour                      | yellow                                                           |
| Shape                       | chunk                                                            |
| Size/ $\text{mm}^3$         | 0.28×0.17×0.11                                                   |
| $T/\text{K}$                | 173                                                              |
| Crystal System              | triclinic                                                        |
| Space Group                 | $P-1$                                                            |
| $a/\text{\AA}$              | 6.9526(2)                                                        |
| $b/\text{\AA}$              | 11.2186(3)                                                       |
| $c/\text{\AA}$              | 17.4355(5)                                                       |
| $\alpha/^\circ$             | 88.790(2)                                                        |
| $\beta/^\circ$              | 85.798(2)                                                        |
| $\gamma/^\circ$             | 79.513(2)                                                        |
| $V/\text{\AA}^3$            | 1333.59(7)                                                       |
| $Z$                         | 4                                                                |
| $Z'$                        | 2                                                                |
| Wavelength/ $\text{\AA}$    | 1.54178                                                          |
| Radiation type              | CuK $_{\alpha}$                                                  |
| $\theta_{min}/^\circ$       | 2.541                                                            |
| $\theta_{max}/^\circ$       | 68.278                                                           |
| Measured Refl's.            | 21093                                                            |
| Ind't Refl's                | 4781                                                             |
| Refl's with $I > 2(I)$      | 4388                                                             |
| $R_{int}$                   | 0.0351                                                           |
| Parameters                  | 424                                                              |
| Restraints                  | 0                                                                |
| Largest Peak                | 0.593                                                            |
| Deepest Hole                | -0.411                                                           |
| GooF                        | 1.065                                                            |
| $wR_2$ (all data)           | 0.0944                                                           |
| $wR_2$                      | 0.0920                                                           |
| $R_1$ (all data)            | 0.0372                                                           |
| $R_1$                       | 0.0344                                                           |

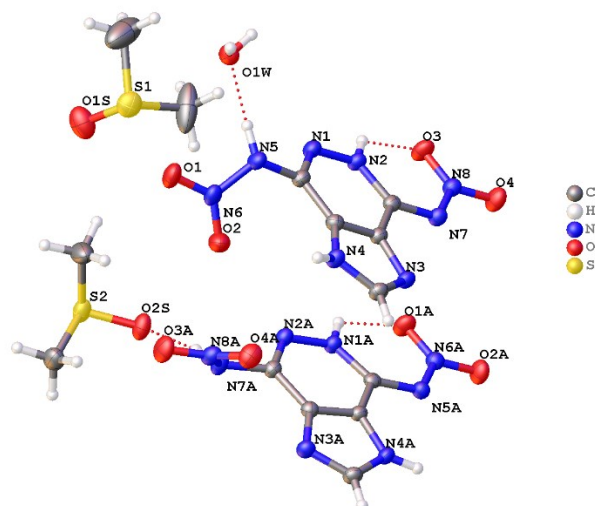

**Figure S15.** Single-crystal X-ray structure of **3**.

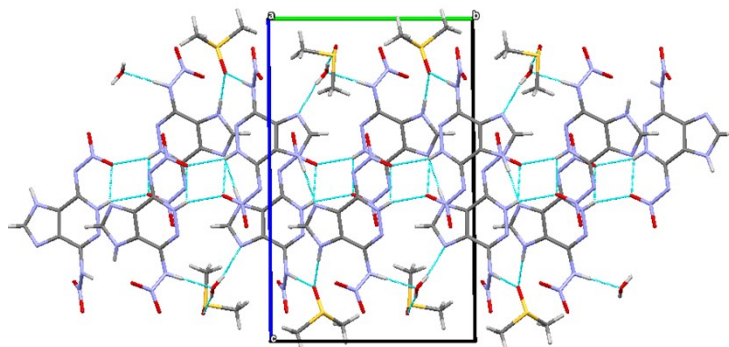

**Figure S16.** Unit cell view for **3** along a axis; hydrogen bonds are marked as dotted lines.

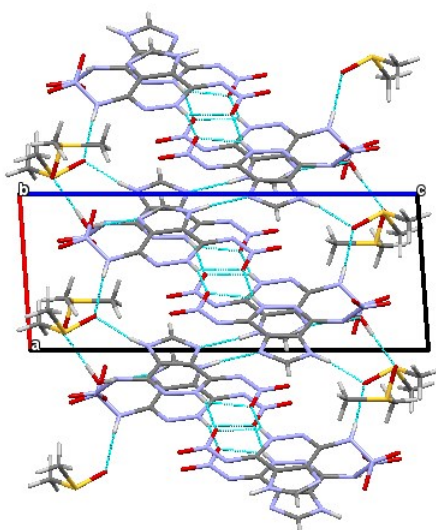

**Figure S17.** Unit cell view for **3** along b axis, hydrogen bonds are marked as dotted lines.

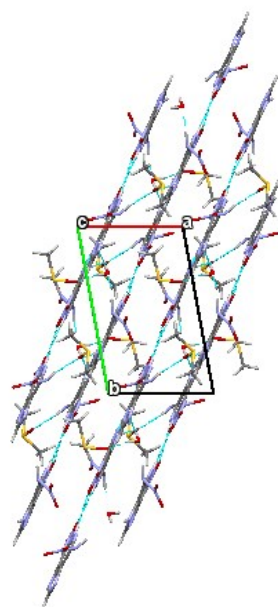

**Figure S18.** Unit cell view for **3** along *c* axis, hydrogen bonds are marked as dotted lines.

**3. Table S2.** Hydrogen bond information for **3** [Å and °]

| D   | H    | A                | d(D-H)/Å | d(H-A)/Å | d(D-A)/Å   | D-H-A/deg |
|-----|------|------------------|----------|----------|------------|-----------|
| N2  | H2   | O3               | 0.84(2)  | 2.01(2)  | 2.5758(19) | 124(2)    |
| N2  | H2   | O1A <sup>1</sup> | 0.84(2)  | 2.23(2)  | 3.0374(19) | 160(2)    |
| N4  | H4   | O2S <sup>2</sup> | 0.85(3)  | 1.85(3)  | 2.6923(19) | 170(2)    |
| N5  | H5   | O1W              | 0.89(3)  | 1.81(3)  | 2.696(2)   | 178(2)    |
| N1A | H1A  | O3 <sup>1</sup>  | 0.86(2)  | 2.25(2)  | 3.0650(19) | 160(2)    |
| N1A | H1A  | O1A              | 0.86(2)  | 2.01(2)  | 2.5795(19) | 123.2(19) |
| N4A | H4AA | N3 <sup>3</sup>  | 0.86(2)  | 1.96(2)  | 2.821(2)   | 176(2)    |
| N7A | H7A  | O2S              | 0.84(2)  | 1.93(2)  | 2.760(2)   | 172(2)    |
| O1W | H1WA | N3A <sup>4</sup> | 0.82(3)  | 1.99(3)  | 2.799(2)   | 170(2)    |
| O1W | H1WB | O1S <sup>2</sup> | 0.88(3)  | 1.79(3)  | 2.660(2)   | 170(3)    |

<sup>1</sup>1-x,1-y,1-z; <sup>2</sup>1+x,+y,+z; <sup>3</sup>2-x,-y,1-z; <sup>4</sup>+x,1+y,+z

#### 4. Theoretical calculations

The calculations of the heats of formation were carried out using Gaussian 03 (Revision D.01) suite of programs. Compound **3** and its derivatives were determined using isodesmic reactions (Scheme S1). The geometric optimization and frequency analyses of the structures were calculated using B3LYP/6-31+G\*\* level. The gas phase enthalpy of formation was computed and the enthalpy of reaction was obtained by combining the MP2/6-311++G\*\* energy differences for the reactions, the scaled zero point energies (ZPE), values of thermal corrections (HT), and other thermal factors.

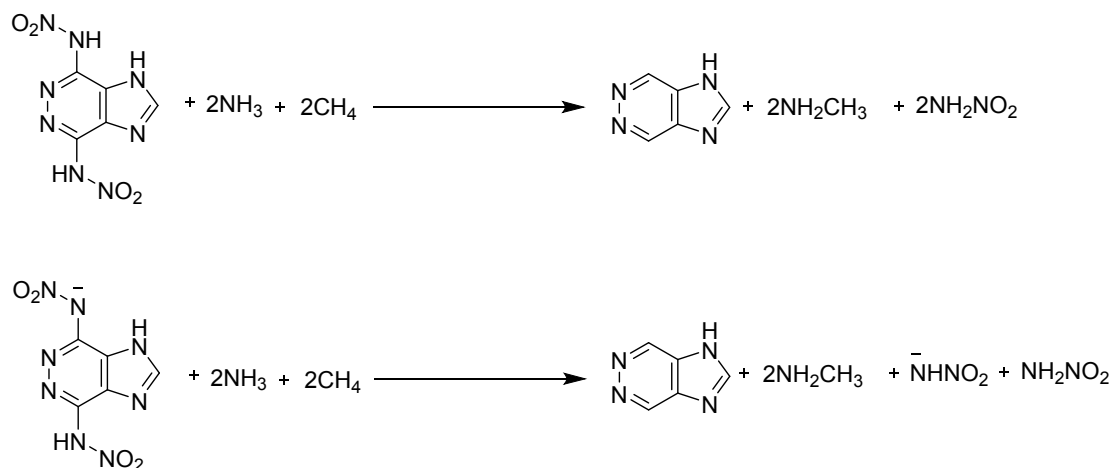

**Scheme S1.** Isodesmic reactions for **3** and its derivatives.

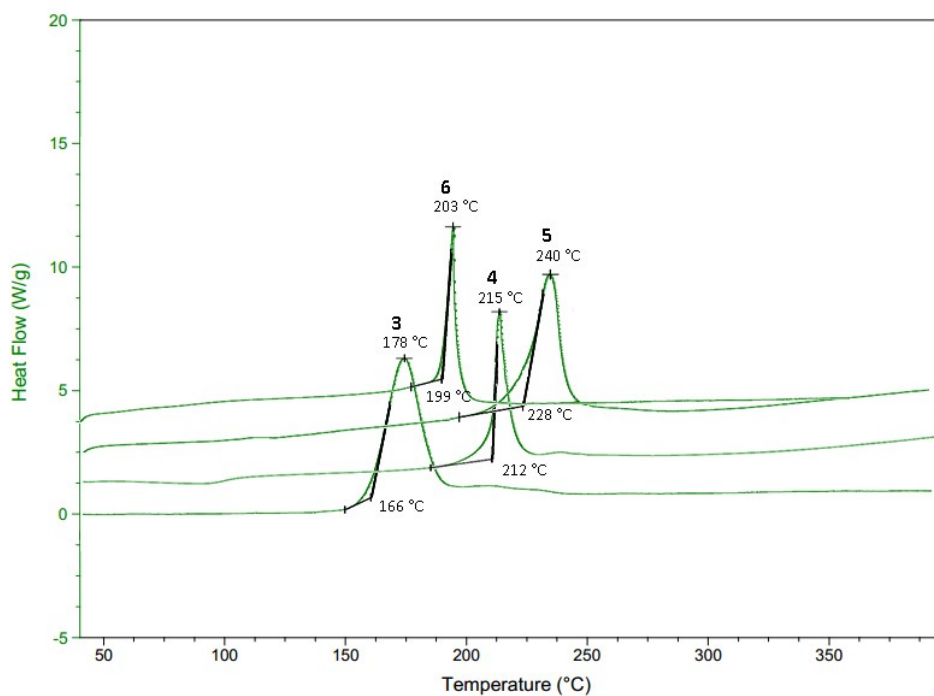

**Figure S19.** DSC spectra of compounds **3** to **6**.

## 5. Reference

1. S. K. Wolff, D. J. Grimwood, J. J. McKinnon, M. J. Turner, D. Jayatilaka, M. A. Spackman, CrystalExplorer (Version 3.1), University of Western Australia, **2012**.
